# Supplementary material for: One-pot production of oxygenated monomers and selectively oxidized lignin from biomass based on plasma electrolysis
Source: Royal Society of Chemistry journal article supplement (doi:10.1039/d1gc03315h), 2021-01-01
Supplement: d1gc03315h1.pdf [file d1gc03315h1.pdf]

## SUPPORTING INFORMATION

### **One-pot production of oxygenated monomers and modified lignin from biomass based on plasma electrolysis**

Lusi A,<sup>a</sup> Harish Radhakrishnan,<sup>a</sup> Hui Hu<sup>b</sup> and Xianglan Bai<sup>\*a</sup>

<sup>a</sup>Department of Mechanical Engineering, Iowa State University, Ames, IA 50011, USA.

<sup>b</sup>Department of Aerospace Engineering, Iowa State University, Ames, IA 50011, USA

\*Corresponding author, E-mail: [bx19801@iastate.edu](mailto:bx19801@iastate.edu)

**Table S1.** Proximate, ultimate, and compositional analyses of red oak

| <i>Ultimate Analysis [wt%]</i>      |       |
|-------------------------------------|-------|
| Carbon                              | 46.13 |
| Hydrogen                            | 6.38  |
| Oxygen                              | 47.34 |
| Nitrogen                            | 0.15  |
| <i>Proximate Analysis [wt%]</i>     |       |
| Moisture                            | 7.74  |
| Volatiles                           | 80.39 |
| Fixed carbon                        | 11.46 |
| Ash                                 | 0.64  |
| <i>Compositional Analysis [wt%]</i> |       |
| Cellulose                           | 41    |
| Hemicellulose                       | 16    |
| Lignin                              | 23    |
| Other                               | 20    |

**Table S2.** Molecular weight and polydispersity of MWL and PELs produced using different reaction conditions.  $f = 6$  kHz.

|                         | MWL  | PEL<br>300 mg<br>10.5 mM<br>6 kV<br>20 min | PEL<br>300 mg<br>10.5 mM<br>7 kV<br>20 min | PEL<br>100 mg<br>10.5 mM<br>7 kV<br>20 min | PEL<br>300 mg<br>10.5 mM<br>7 kV<br>10 min | PEL<br>300 mg<br>7 mM<br>7 kV<br>20 min | PEL<br>300 mg<br>14 mM<br>7 kV<br>20 min |
|-------------------------|------|--------------------------------------------|--------------------------------------------|--------------------------------------------|--------------------------------------------|-----------------------------------------|------------------------------------------|
| Number Average<br>$M_n$ | 1566 | 955                                        | 955                                        | 973                                        | 996                                        | 1121                                    | 876                                      |
| Weight Average<br>$M_w$ | 3853 | 1919                                       | 2013                                       | 2194                                       | 2282                                       | 3098                                    | 2023                                     |
| Polydispersity<br>PD    | 2.46 | 2.01                                       | 2.11                                       | 2.25                                       | 2.29                                       | 2.76                                    | 2.31                                     |

**Table S3.** The list of phenolic monomers and their yields produced from pyrolysis of MWL, PELs, and the thermally-based lignin. Reaction conditions for PELs: 10.5 mM acid, V = 7 kV and f = 6 kHz. The reaction condition for the thermally-based lignin: 10.5 mM acid, 165 °C, and 30 min.

|    |                                                          | Monomer Yield [wt%] |            |            |            | Thermally-based lignin |
|----|----------------------------------------------------------|---------------------|------------|------------|------------|------------------------|
|    |                                                          | MWL                 | PEL 10 min | PEL 15 min | PEL 20 min |                        |
| 1  | Phenol                                                   | 0.06±0.00           | 0.33±0.05  | 0.52±0.08  | 0.52±0.07  | 0.11±0.01              |
| 2  | Guaiacol                                                 | 0.35±0.01           | 1.05±0.19  | 1.19±0.09  | 1.18±0.11  | 0.60±0.00              |
| 3  | o-Cresol                                                 | 0.07±0.00           | 0.13±0.10  | 0.20±0.07  | 0.28±0.04  | 0.05±0.03              |
| 4  | p-cresol                                                 | 0.08±0.00           | 0.00±0.00  | 0.00±0.00  | 0.00±0.00  | 0.00±0.00              |
| 5  | p-Methyl Guaiacol                                        | 0.05±0.00           | 0.43±0.13  | 0.58±0.05  | 0.64±0.06  | 0.10±0.03              |
| 6  | o-Methyl Guaiacol                                        | 0.01±0.00           | 1.15±0.18  | 1.16±0.07  | 1.38±0.04  | 0.57±0.02              |
| 7  | phenol, 2,5-dimethyl-                                    | 0.07±0.00           | 0.00±0.00  | 0.00±0.00  | 0.00±0.00  | 0.00±0.00              |
| 8  | 3,4-dimethyl-2-methoxy Phenol                            | 0.84±0.03           | 0.21±0.09  | 0.20±0.07  | 0.29±0.07  | 0.03±0.01              |
| 9  | 4-Ethyl Phenol                                           | 0.00±0.00           | 0.69±0.36  | 1.13±0.10  | 1.32±0.09  | 0.17±0.01              |
| 10 | 4-Ethyl Guaiacol                                         | 0.20±0.00           | 1.08±0.29  | 1.44±0.17  | 1.88±0.20  | 0.46±0.03              |
| 11 | 4-Vinyl Phenol                                           | 0.52±0.00           | 1.30±0.58  | 1.98±0.13  | 2.09±0.43  | 0.35±0.02              |
| 12 | 4-Vinyl Guaiacol                                         | 0.14±0.01           | 2.14±0.55  | 2.20±0.13  | 2.35±0.03  | 0.90±0.03              |
| 13 | Syringol                                                 | 0.63±0.03           | 1.91±0.45  | 1.98±0.12  | 1.86±0.10  | 0.97±0.02              |
| 14 | 2-methoxy-4-propyl-phenol                                | 0.10±0.01           | 0.00±0.00  | 0.00±0.00  | 0.00±0.00  | 0.00±0.00              |
| 15 | 4-Hydroxy-3-Methoxybenzoic Acid                          | 0.00±0.00           | 1.86±0.34  | 2.12±0.04  | 2.15±0.11  | 1.08±0.04              |
| 16 | 1,2,4-Trimethoxytoluene                                  | 1.43±0.09           | 0.26±0.09  | 0.42±0.08  | 0.33±0.12  | 0.13±0.01              |
| 17 | Trans-isoeugenol                                         | 0.34±0.02           | 0.19±0.03  | 0.20±0.03  | 0.22±0.01  | 0.00±0.00              |
| 18 | Vanillin                                                 | 0.21±0.01           | 0.68±0.32  | 1.21±0.27  | 0.84±0.10  | 0.22±0.01              |
| 19 | 1,2,3-trimethoxy-5-methyl-benzene                        | 0.39±0.04           | 0.03±0.01  | 0.02±0.00  | 0.02±0.01  | 0.09±0.02              |
| 20 | Apocynin                                                 | 0.21±0.01           | 0.21±0.03  | 0.21±0.01  | 0.24±0.01  | 0.00±0.00              |
| 21 | 3',5'-Dimethoxyacetophenone                              | 0.65±0.01           | 0.54±0.10  | 0.70±0.10  | 0.51±0.05  | 0.25±0.02              |
| 22 | 2,6-Dimethoxy-4-allylphenol                              | 0.90±0.06           | 0.49±0.13  | 0.64±0.08  | 0.47±0.02  | 0.20±0.01              |
| 23 | 4-hydroxy-3,5-dimethoxy-benzaldehyde                     | 0.38±0.04           | 0.27±0.03  | 0.28±0.02  | 0.28±0.01  | 0.11±0.01              |
| 24 | 2,6-Dimethoxy-4-allylphenol                              | 0.00±0.00           | 0.40±0.10  | 0.70±0.10  | 0.61±0.07  | 0.20±0.01              |
| 25 | 3,5-dimethoxy-4-hydroxyphenylacetic acid                 | 0.13±0.04           | 0.30±0.01  | 0.30±0.04  | 0.27±0.04  | 0.14±0.02              |
| 26 | 3,4,5-trimethoxyphenylacetic acid                        | 0.08±0.01           | 0.30±0.10  | 0.26±0.03  | 0.23±0.01  | 0.12±0.02              |
| 27 | 1-(4-hydroxy-3-methoxyphenyl)- 2-propanone               | 0.07±0.02           | 0.00±0.00  | 0.00±0.00  | 0.00±0.00  | 0.00±0.00              |
| 28 | 1-(4-hydroxy-3,5-dimethoxyphenyl)-ethanone               | 0.30±0.04           | 0.00±0.00  | 0.00±0.00  | 0.00±0.00  | 0.00±0.00              |
| 29 | 2-oxo-2-phenylethyl benzoate                             | 0.00±0.00           | 0.32±0.04  | 0.34±0.04  | 0.24±0.01  | 0.09±0.02              |
| 30 | Methyl 3-(4-hydroxy-3,5-dimethoxyphenyl)-3-oxopropanoate | 0.00±0.00           | 0.26±0.07  | 0.37±0.00  | 0.30±0.01  | 0.00±0.00              |
| 31 | 2-oxo-2-phenylethyl acetate                              | 0.00±0.00           | 0.14±0.03  | 0.21±0.03  | 0.15±0.01  | 0.05±0.01              |
| 32 | 1-(2,4,6-trihydroxyphenyl) desaspidinol/2-pentanone      | 0.10±0.02           | 0.00±0.00  | 0.00±0.00  | 0.00±0.00  | 0.00±0.00              |
| 33 | (E)-3-(4-hydroxy-3,5-dimethoxyphenyl) acrylaldehyde      | 0.00±0.00           | 0.12±0.03  | 0.12±0.02  | 0.11±0.01  | 0.00±0.00              |
| 34 | 3,5-dimethoxy-4-hydroxycinnamaldehyde                    | 0.30±0.04           | 0.11±0.06  | 0.16±0.01  | 0.14±0.01  | 0.00±0.00              |
|    | Sum                                                      | 8.61                | 16.92      | 20.86      | 20.91      | 6.96                   |

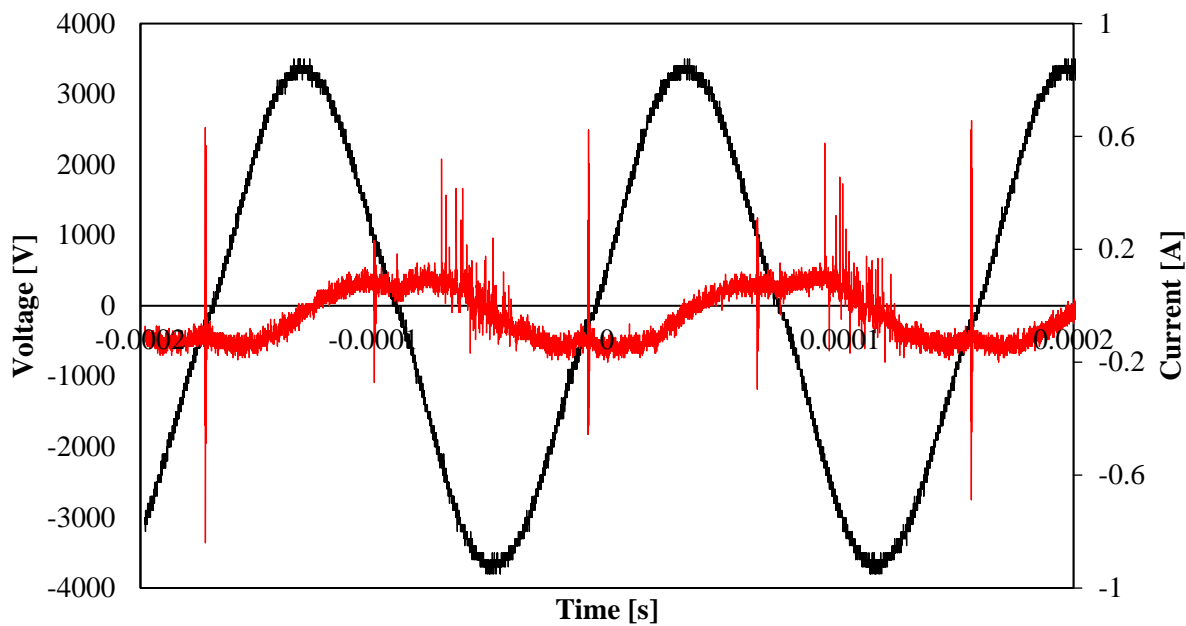

**Figure S1.** Current and voltage waveform. The current spikes are due to dielectric breakdown and microdischarge.

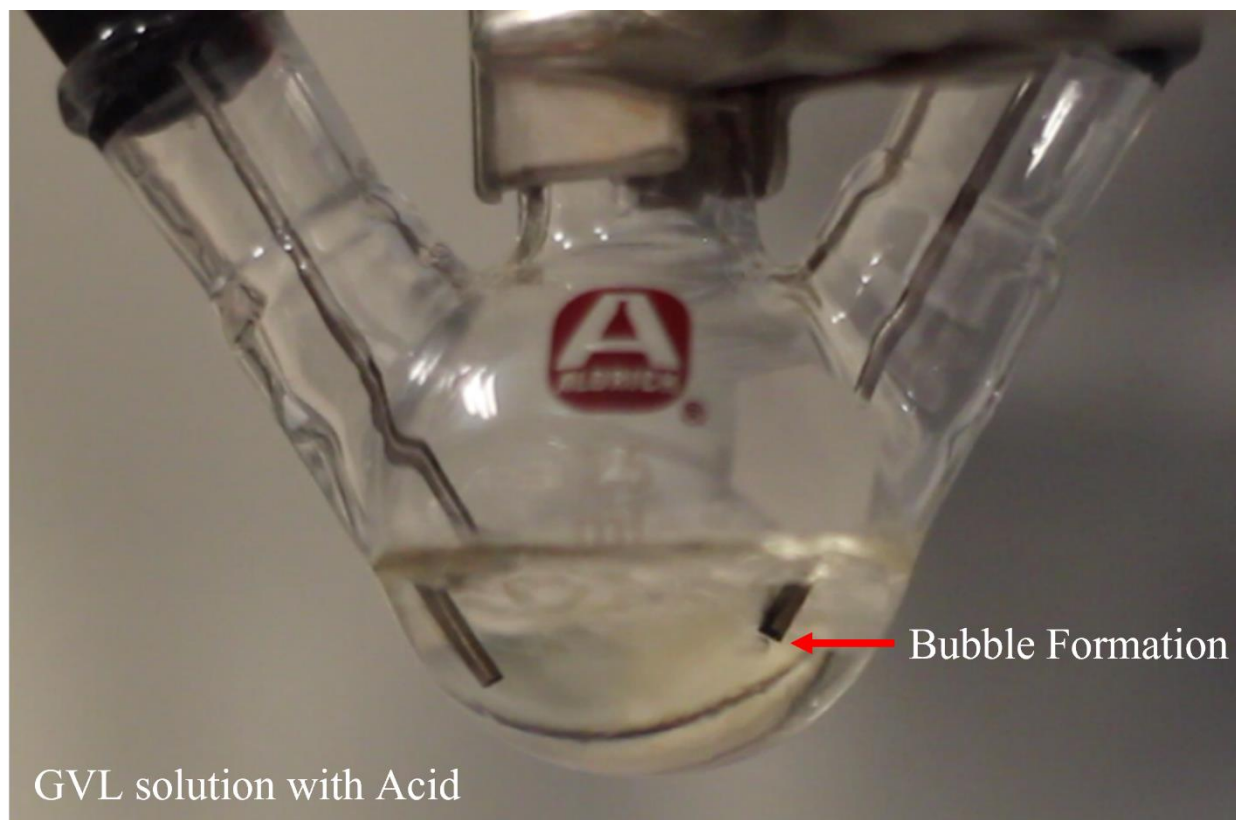

**Figure S2.** Bubble formation inside the solvent near the electrode prior to the plasma generation.

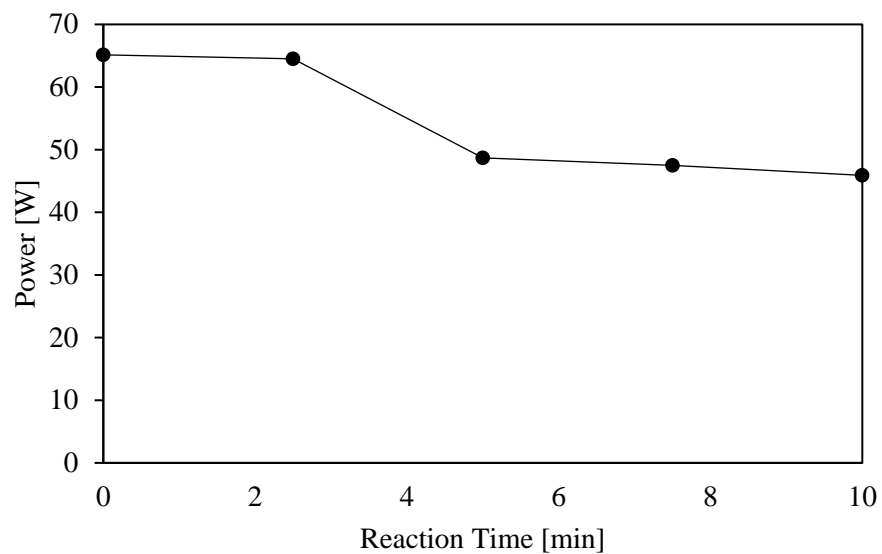

**Figure S3.** The measured power input during plasma electrolysis of red oak. Reaction conditions: biomass loading: 4 wt%;  $V = 7$  kV;  $f = 6$  kHz; 10.5 mM acid.

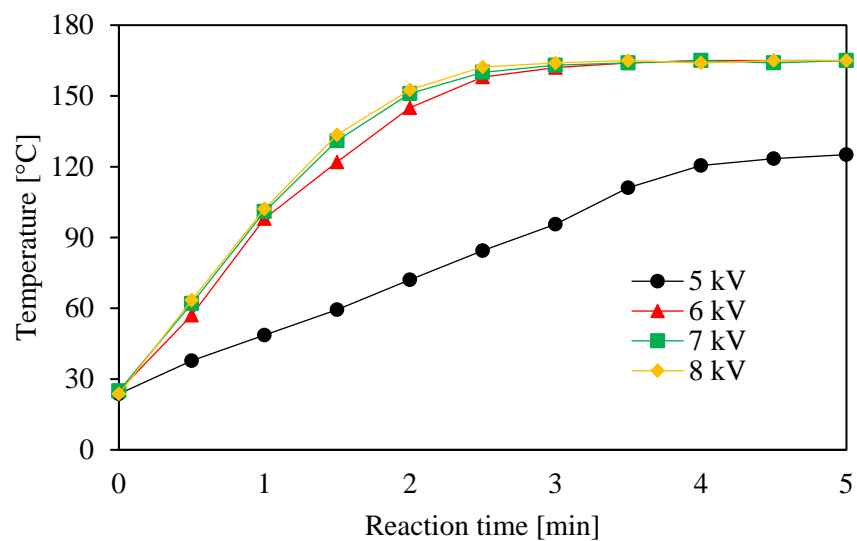

**Figure S4.** The effect of electric voltage on the temperature profiles of the solvent. Reaction conditions:  $f = 6$  kHz; 10.5 mM acid.

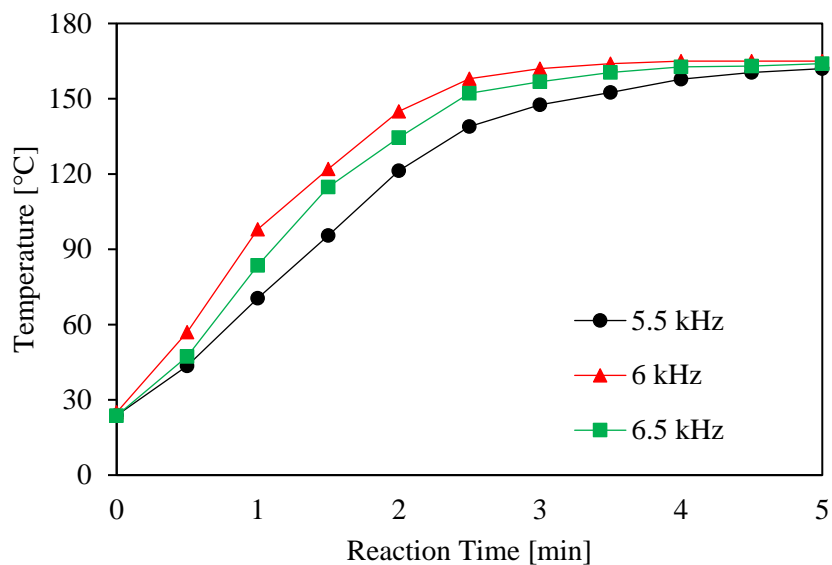

**Figure S5.** The effect of electric frequency on the temperature profiles of the solvent. Biomass loading: 4 wt%. Other reaction conditions:  $V = 6$  kV; acid concentration = 10.5 mM.

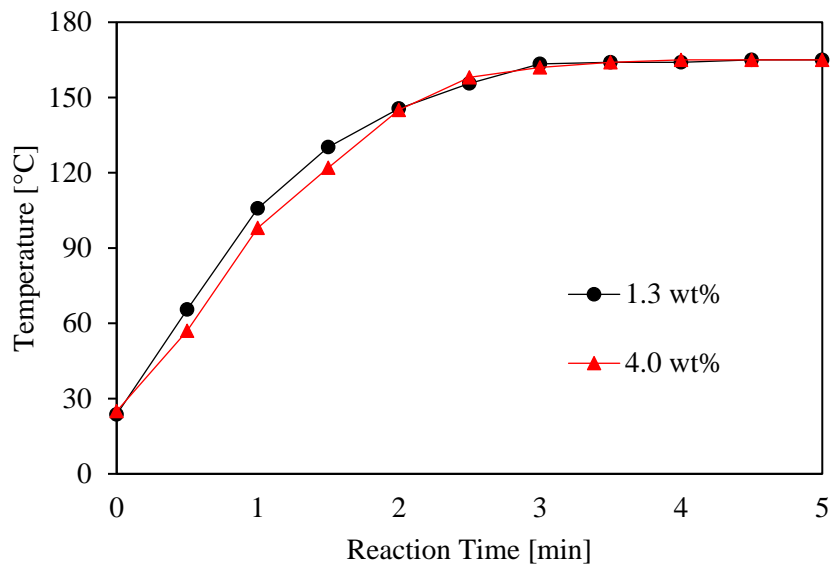

**Figure S6.** The effect of biomass loading on the temperature profiles of the solvent. Other reaction conditions:  $V = 6$  kV;  $f = 6$  kHz; acid concentration = 7.0 mM.

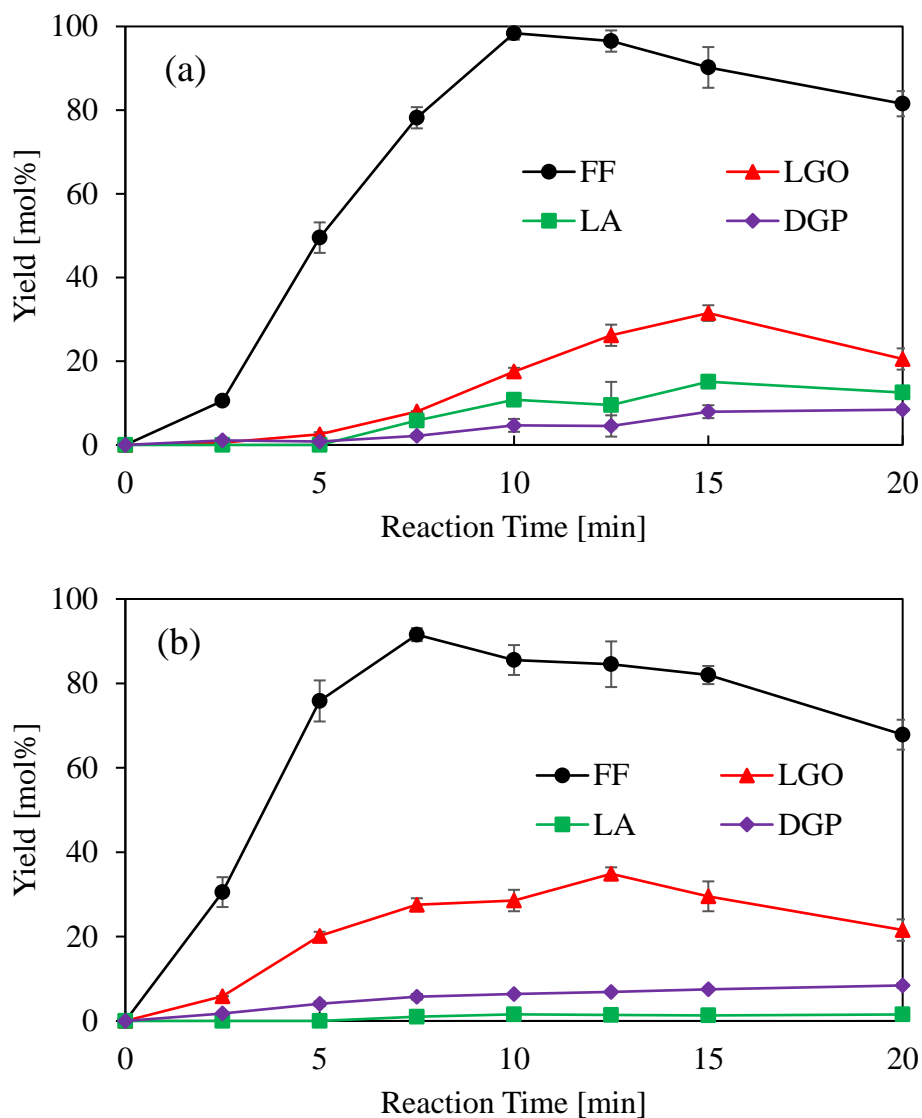

**Figure S7.** Monomer production during plasma electrolysis with 1 wt.% water in solvent. (a)  $V = 6$  kV; (b)  $V = 7$  kV. Biomass loading: 4 wt%. Other reaction conditions: 10.5 mM acid and  $f = 6$  kHz.

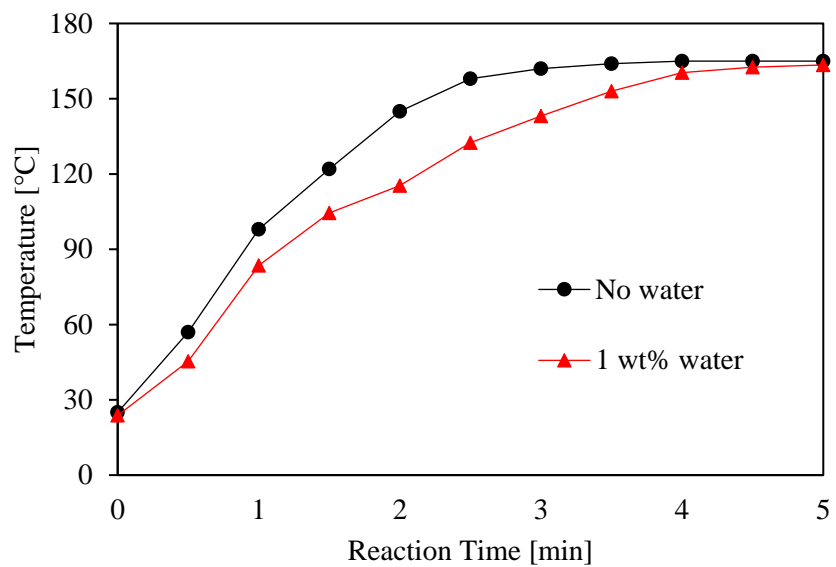

**Figure S8.** The effect of water addition on the temperature profiles of the solvent. Biomass loading: 4 wt%. Other reaction conditions:  $V = 6$  kV;  $f = 6$  kHz; acid concentration = 10.5 mM.



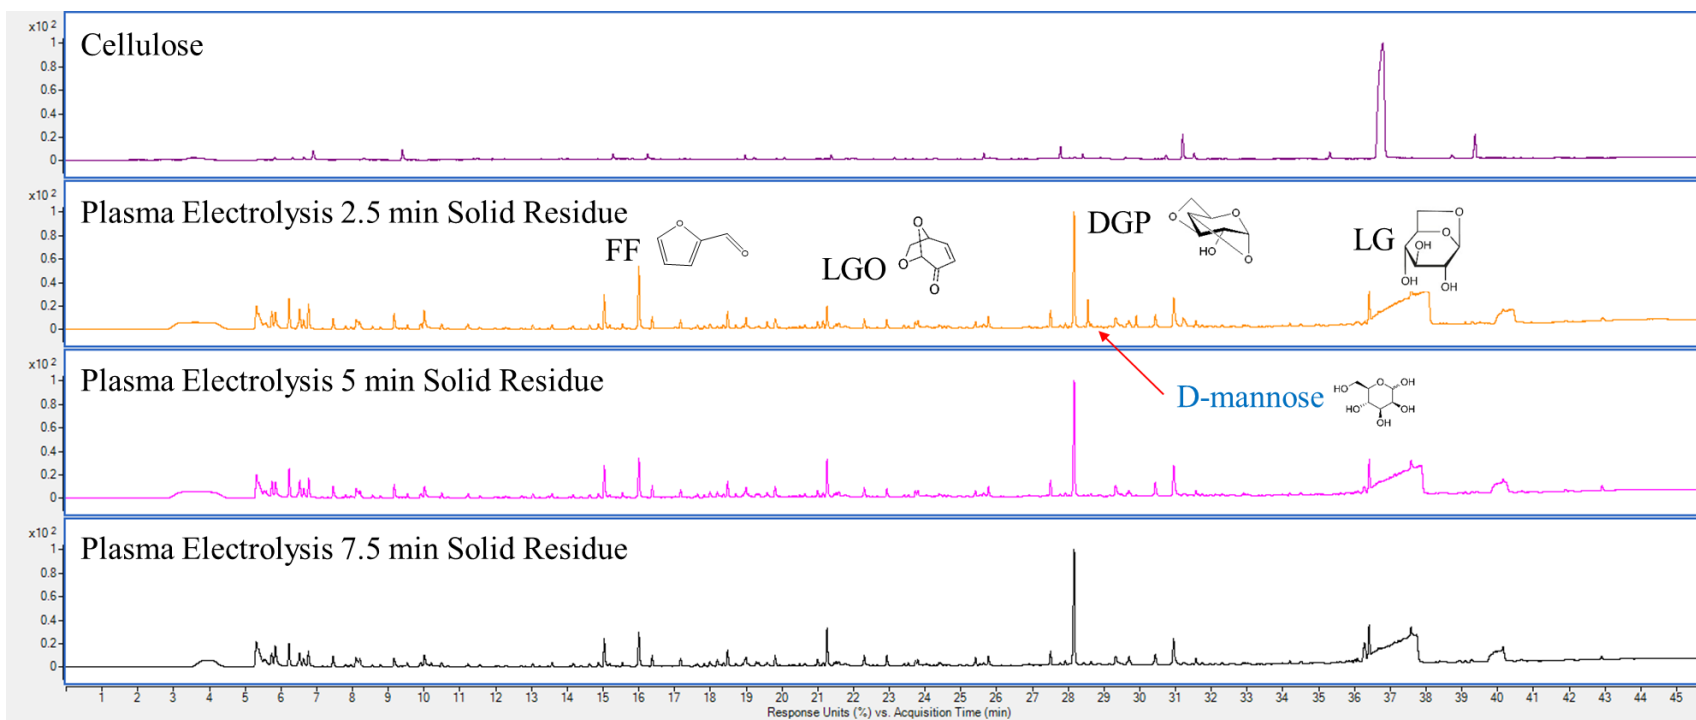

**Figure S9.** Pyrolysis GC/MS chromatograms of cellulose or the solid residues recovered during plasma electrolysis of red oak with different conversion times. Plasma electrolysis condition: 10.5 mM acid,  $V = 7$  kV and  $f = 6$  kHz.

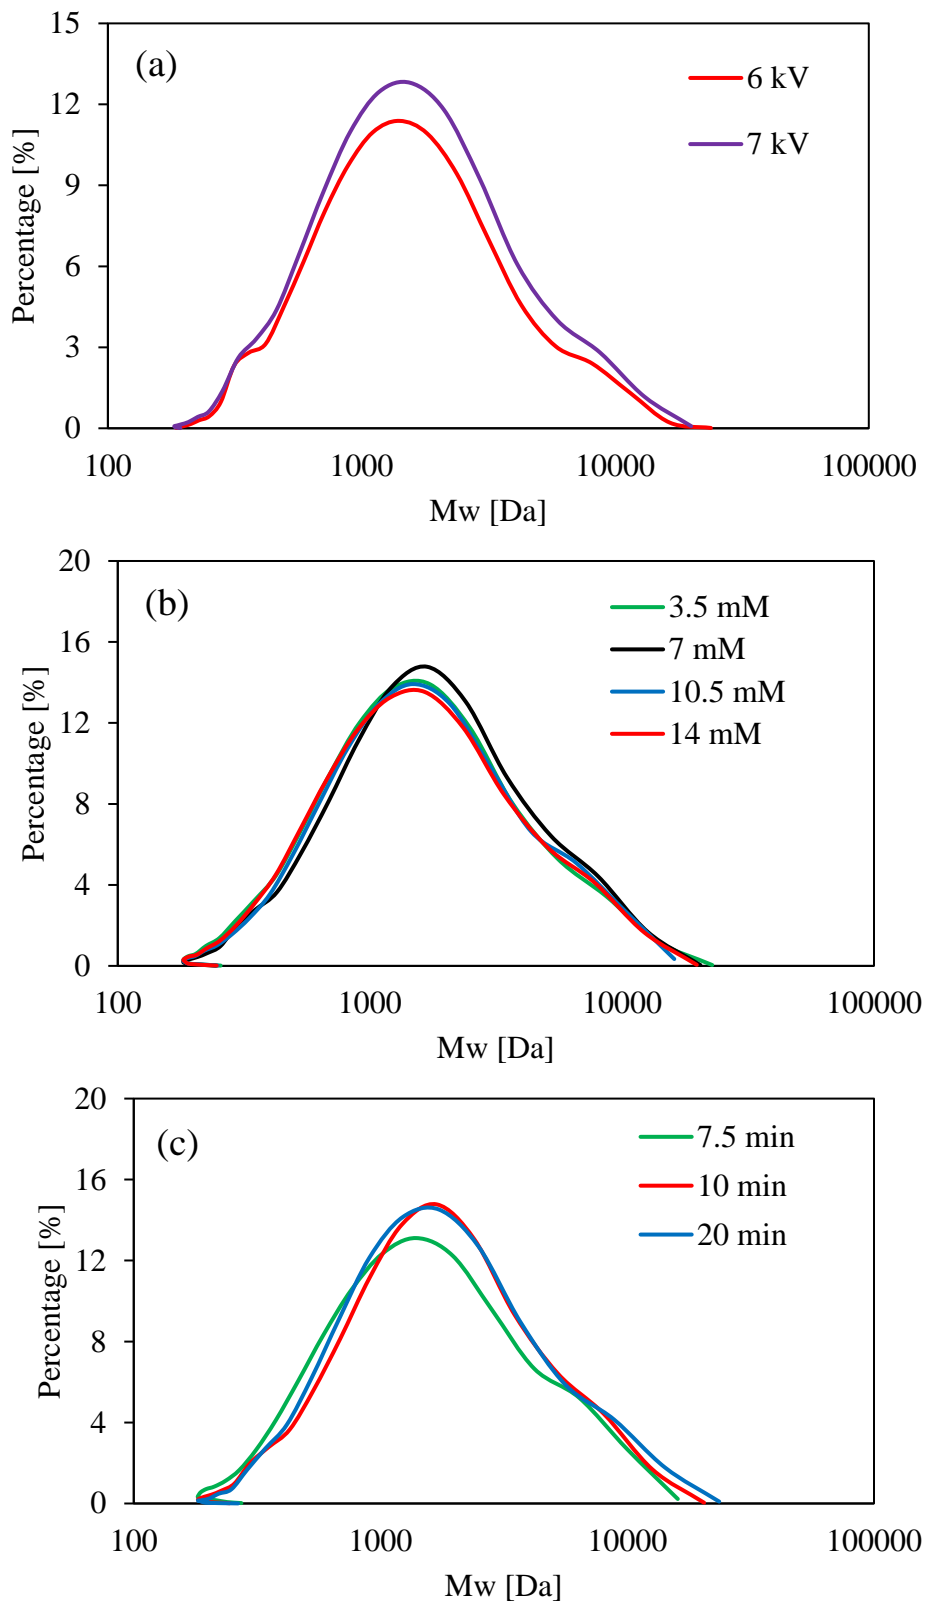

**Figure S10.** Molecular weight distribution of PELs with different plasma electrolysis conditions. (a) different voltage; (b) different acid concentration; (c) different treatment time. Other reaction conditions other than changing parameter: 10.5 mM acid,  $V = 7$  kV, and  $f = 6$  kHz.

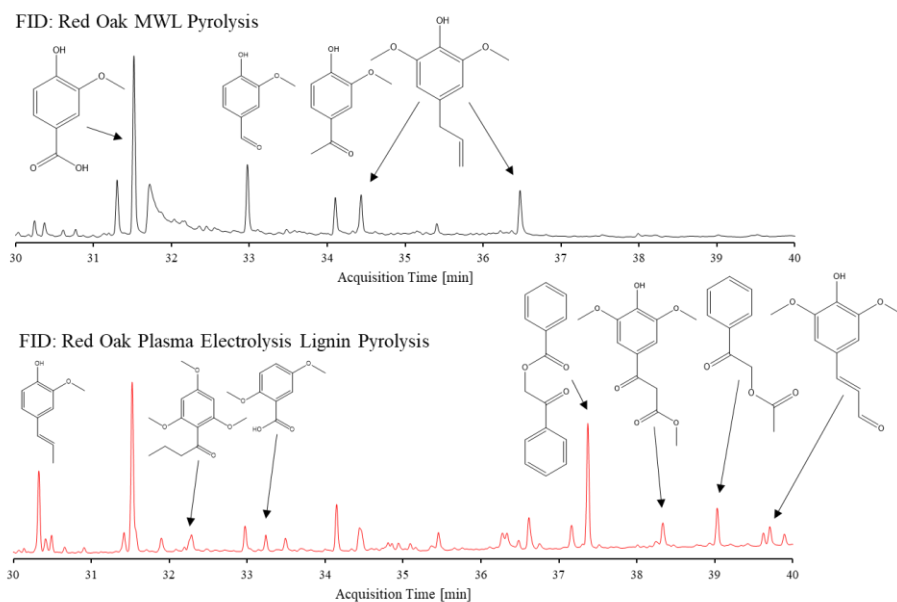

**Figure S11.** Pyrolysis-GC/MS chromatograms of MWL and PEL. Shown retention time between 30 and 40 mins. Plasma electrolysis condition for obtaining the PEL: 10.5 mM acid,  $V = 7$  kV,  $f = 6$  kHz, and 20 min.
